# Supplementary material for: Allopregnanolone Promotes Migration and Invasion of Human Glioblastoma Cells through the Protein Tyrosine Kinase c-Src Activation
Source: MDPI journal article supplement (doi:10.3390/ijms23094996), 2022-04-30
Supplement: s1 [file s1]

**Allopregnanolone promotes migration and invasion of human glioblastoma cells  
through c-Src activation**

**Carmen J Zamora-Sánchez<sup>1</sup>, Claudia Bello-Alvarez<sup>1</sup>, Mauricio Rodríguez-Dorantes<sup>2</sup>, and  
Ignacio Camacho-Arroyo<sup>1,\*</sup>**

**SUPPLEMENTARY FIGURES AND FIGURE LEGENDS**

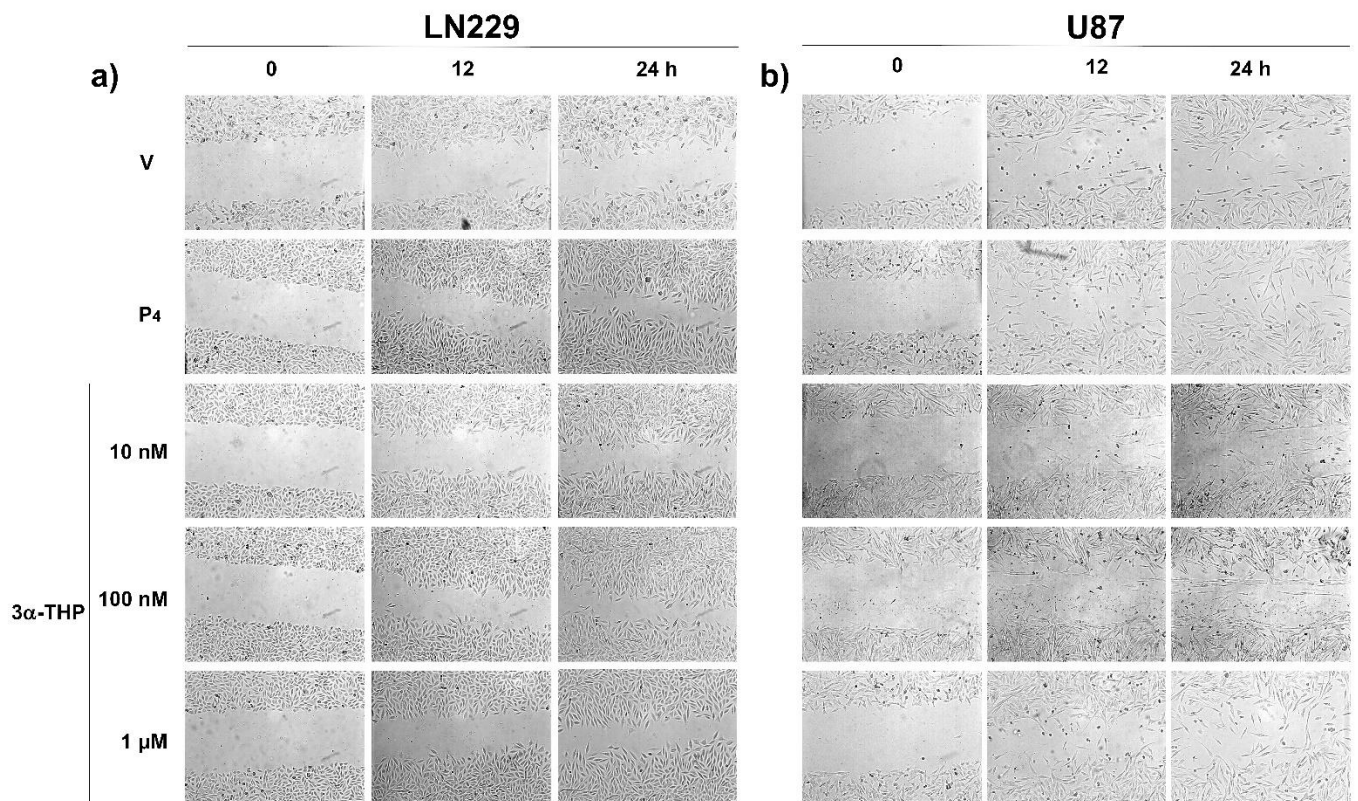

**Supplementary Figure S1.** Representative experiments of migration assays in **a)** LN229 and **b)** U87 cell lines. Cells were treated with progesterone (P4 10 nM) as a positive control and different concentrations of 3α-THP.

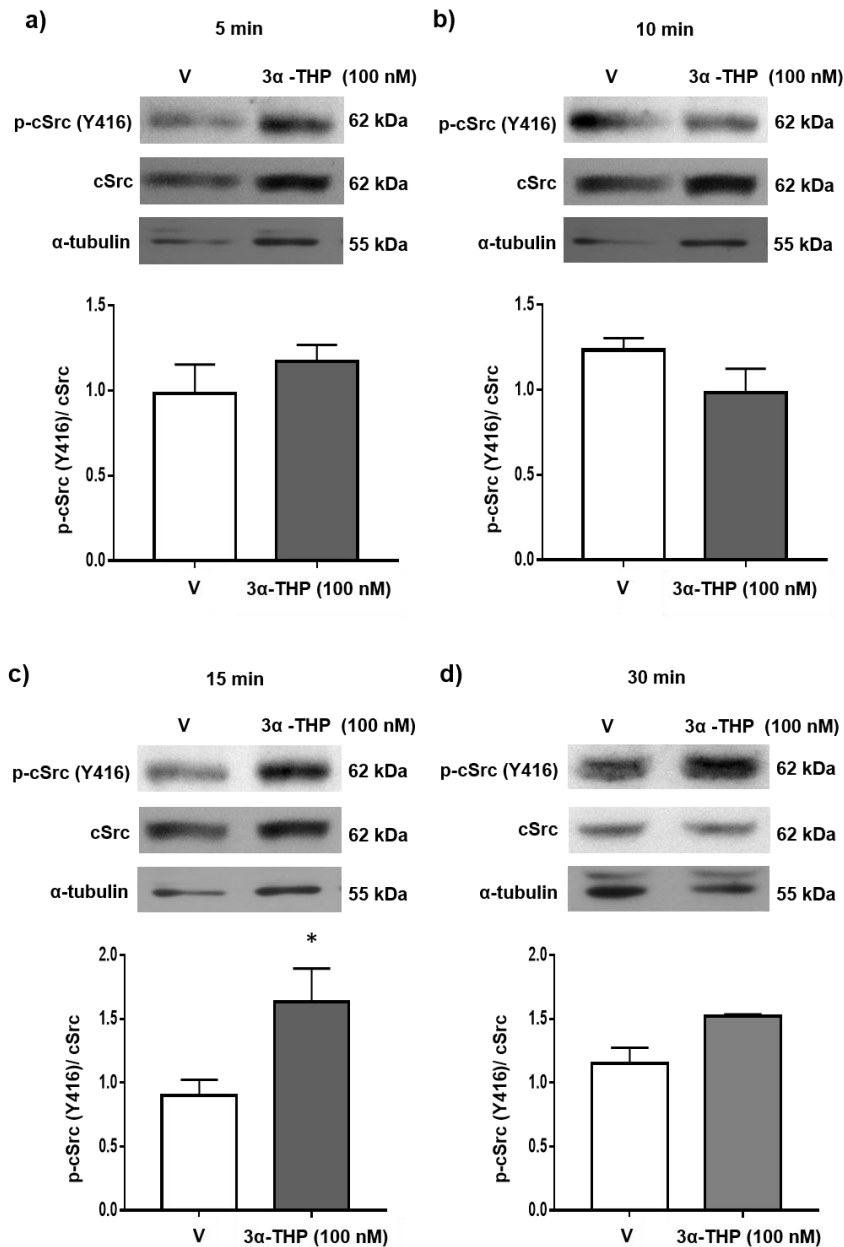

**Supplementary Figure S2.** Effect of 3α-THP on c-Src activation in U87 cells in a time-course experiment. The phosphorylation of c-Src (Y416) was determined by Western blot under the treatment of 3α-THP 100 nM or Vehicle (V, EtOH 0.01 %) for **a)** 5 min; **b)** 10 min; **c)** 15 min; **d)** 30 min. The upper panel of each section shows a representative Western blot experiment of p-c-Src, total c-Src and α-tubulin as loading control. Each lower panel presents the densitometric analysis of p-cSrc/c-Src. Each column represents the mean ± SEM, n = 3; \*p < 0.05 3α-THP vs V.

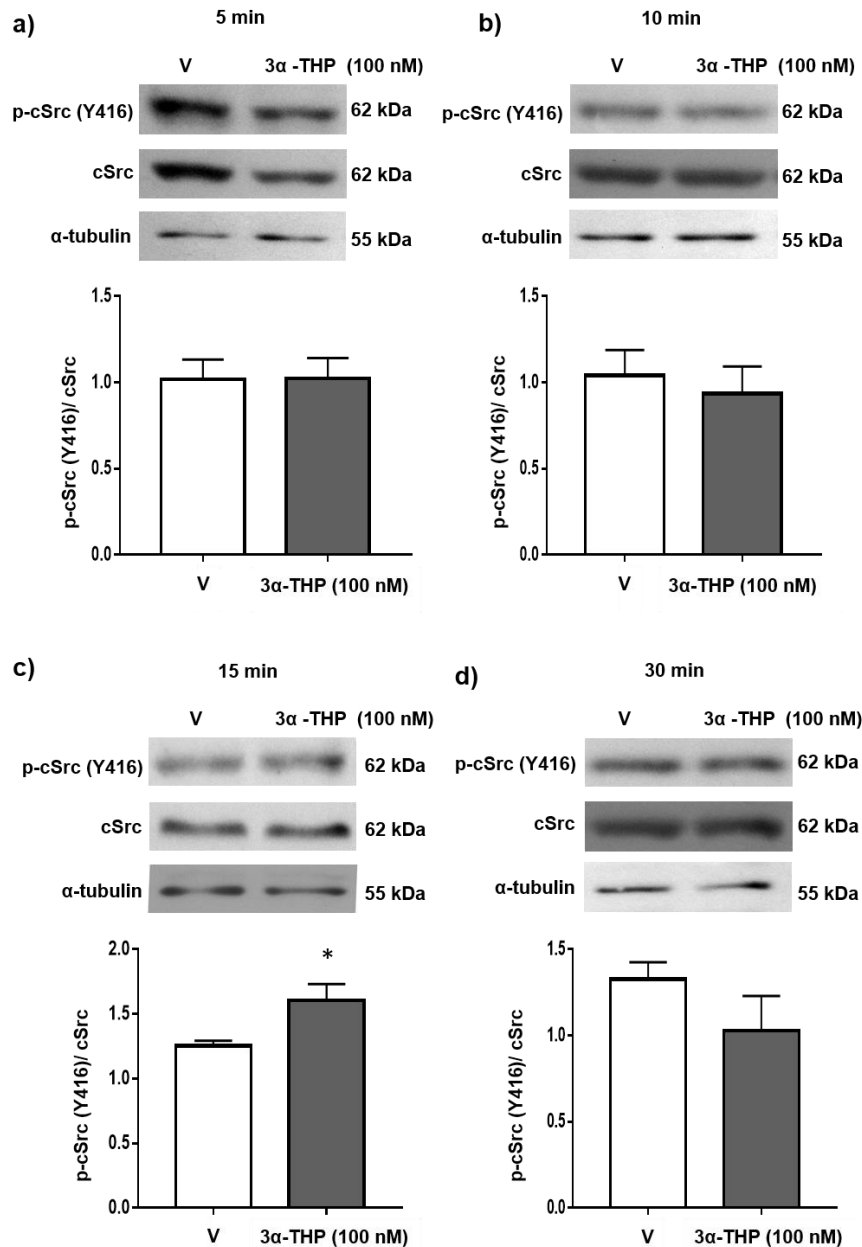

**Supplementary Figure S3.** Effect of 3α-THP on c-Src activation in LN229 cell line in a time-course experiment. The phosphorylation of c-Src (Y416) was determined by Western blot under the treatment of 3α-THP 100 nM or Vehicle (V, EtOH 0.01 %) for **a)** 5 min; **b)** 10 min; **c)** 15 min; and **d)** 30 min. The upper panel of each section shows a representative Western blot experiment of p-cSrc, total c-Src and α-tubulin as loading control. Each lower panel presents the densitometric analysis of p-cSrc/c-Src. Each column represents the mean ± SEM., n = 3; \*p < 0.05 3α-THP vs V.

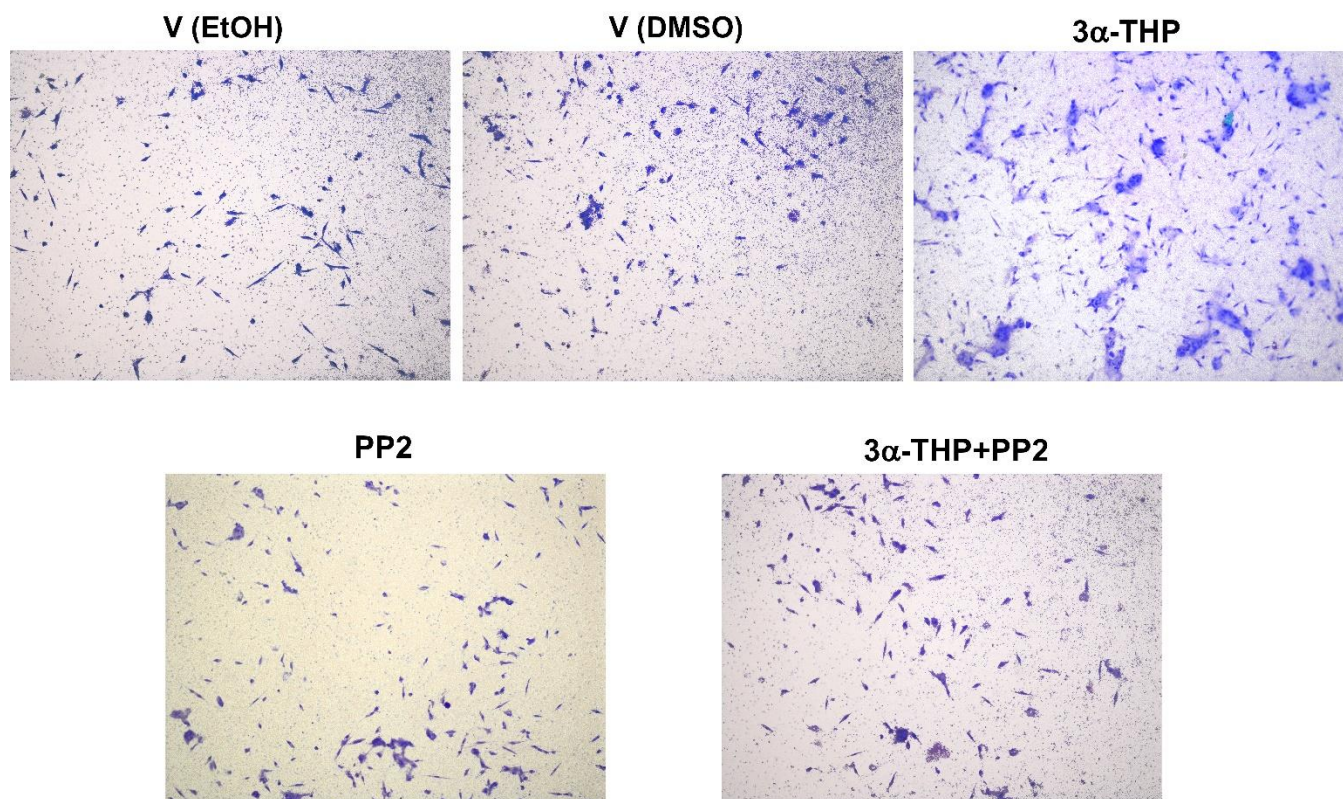

**Supplementary Figure S4.** Effect of 3α-THP and the pharmacological inhibitor of c-SRC, PP2 on U87 cell invasion. Representative images of invasion experiments in the U87 cell line. All photographs were taken at 10X augment.
